# Supplementary material for: Remote ischaemic conditioning for stroke: unanswered questions and future directions
Source: HighWire-hosted journal article supplement (doi:10.1136/svn-2020-000722), 2021-04-26
Supplement: svn-2020-000722supp001_data_supplement.pdf [file svn-2020-000722supp001_data_supplement.pdf]

**Supplementary material 1.** Ongoing Studies of Remote Ischaemic Conditioning (RIC) in Stroke

| Study                                                                                    | Status                | Population                          | N   | RIC Protocol                                      | Control Group(s)            | Primary Outcome                                           | Selected Secondary Outcome Measures                                                    |
|------------------------------------------------------------------------------------------|-----------------------|-------------------------------------|-----|---------------------------------------------------|-----------------------------|-----------------------------------------------------------|----------------------------------------------------------------------------------------|
| <b>REMOTE ISCHAEMIC PRE-CONDITIONING</b>                                                 |                       |                                     |     |                                                   |                             |                                                           |                                                                                        |
| NEAT<br>(NCT03496415)<br>China<br>2018-19                                                | Recruiting            | Unruptured<br>CA pre-ET             | 210 | Unspecified<br>cycle length<br>(200mmHg)          | Sham RIC<br>(60mmHg)        | New DWI lesions day 3                                     | Ischaemic lesion burden<br>NIHSS day 7<br>mRS day 30                                   |
| NCT03814850<br>USA<br>2019-22                                                            | Not yet<br>recruiting | Unruptured<br>CA pre-ET             | 50  | 4 x 5 mins<br>(30mmHg ><br>SBP)<br>Unilateral UL  | Sham RIC<br>(30mmHg)        | Adverse events                                            | Cognitive impairment day 2-4<br>and 9 months<br><br>Ischaemic lesion volume day<br>2-4 |
| RIPAT<br>(NCT02162654)<br><sup>26</sup><br>Austria<br>2013-16                            | Unknown               | Unruptured<br>CA pre-<br>ET/surgery | 48  | 3 x 5 mins<br>(200mmHg)<br>Unilateral UL          | Sham RIC<br>(10mmHg)        | Biomarkers (S100B,<br>NSE, GFAP, MMP9,<br>Microparticles) | New ischaemic lesions day 1-<br>2<br><br>NIHSS and mRS at 12<br>months                 |
| <b>REMOTE ISCHAEMIC PER-CONDITIONING AND/OR EARLY REMOTE ISCHAEMIC POST-CONDITIONING</b> |                       |                                     |     |                                                   |                             |                                                           |                                                                                        |
| RESCUE-<br>BRAIN<br>(NCT02189928)<br><sup>28</sup><br>France<br>2015-19                  | Completed             | AIS                                 | 200 | 4 x 5 mins<br>(110mmHg ><br>SBP)<br>Unilateral LL | Usual<br>medical<br>therapy | DWI MRI infarct<br>volume at 24 hrs                       | mRS day 90                                                                             |

|                                                                               |                       |                     |          |                                                                                 |                      |                                                          |                                                                                                                                                               |
|-------------------------------------------------------------------------------|-----------------------|---------------------|----------|---------------------------------------------------------------------------------|----------------------|----------------------------------------------------------|---------------------------------------------------------------------------------------------------------------------------------------------------------------|
| RICAMIS<br>(NCT03740971)<br><sup>62</sup><br>China<br>2018-20                 | Recruiting            | AIS<br>(NIHSS 6-16) | 180<br>0 | 5 x 5 mins<br>(200mmHg)<br>Bilateral UL<br>Twice daily<br>10-14 days            | Usual care           | mRS day 90                                               | NIHSS day 12<br>Stroke associated pneumonia<br>All cause mortality day 90<br>Biomarkers (BDNF, VEGF,<br>HIF-1 $\alpha$ , TNF- $\alpha$ , IL-1 $\beta$ , IL-6) |
| RESIST<br>(NCT03481777)<br>Denmark<br>2018-24                                 | Recruiting            | AIS and<br>ICH      | 150<br>0 | 5 x 5 mins<br>(200mmHg)<br>Unilateral UL<br>Twice daily<br>up to 7 days         | Sham RIC<br>(20mmHg) | mRS day 90                                               | Recurrent ischaemic stroke at<br>12 months<br><br>Flow cytometry<br>MicroRNA                                                                                  |
| PROTECT-I<br>(NCT03915782)<br>France<br>2019-21                               | Not yet<br>recruiting | AIS + MT            | 126      | 4 x 5 mins<br>(200mmHg)<br>UL                                                   | Sham RIC<br>(30mmHg) | Infarct volume day 1<br>(FLAIR)                          | NIHSS day 7<br>mRS day 90                                                                                                                                     |
| SERIC-sICH<br>(NCT03484936)<br>China<br>2018-21                               | Not yet<br>recruiting | Acute sICH          | 530      | 4 x 5 mins<br>(200mmHg)<br>UL<br>Twice daily<br>7 days                          | Sham RIC             | mRS day 90                                               | Adverse events<br>CT haematoma expansion 24<br>hrs                                                                                                            |
| REVISE-2<br>(NCT03045055)<br>China<br>2018-19                                 | Not yet<br>recruiting | AIS + MT            | 180      | 4 x 5 mins<br>(200mmHg)<br>Unilateral UL                                        | Sham RIC<br>(60mmHg) | Final CT infarct volume                                  | Trial feasibility<br>mRS day 9<br>Change in NIHSS                                                                                                             |
| REPOST<br>( <a href="#">NTR6880</a> ) <sup>63</sup><br>Netherlands<br>2018-21 | Recruiting            | AIS                 | 200      | 4 x 5 mins<br>(20mmHg ><br>SBP)<br>Unilateral UL<br>Twice daily<br>up to 4 days | Sham RIC<br>(50mmHg) | MRI DWI infarct<br>volume day 4 (or day of<br>discharge) | NIHSS at discharge<br>mRS day 90<br>Recurrent vascular events at<br>12 months                                                                                 |
| RICH                                                                          | Recruiting            | Acute sICH          | 40       | 4 x 5 mins                                                                      | Usual Care           | Adverse events                                           |                                                                                                                                                               |

|                                                 |                       |                            |     |                                                                        |                                       |                                       |                                                                                                        |
|-------------------------------------------------|-----------------------|----------------------------|-----|------------------------------------------------------------------------|---------------------------------------|---------------------------------------|--------------------------------------------------------------------------------------------------------|
| (NCT03930940)<br>China<br>2019-22               |                       |                            |     | (200mmHg)<br>UL                                                        |                                       |                                       |                                                                                                        |
| REMOTE-CAT<br>(NCT03375762)<br>Spain<br>2019-22 | Recruiting            | Suspected<br>AIS           | 572 | 5 x 5 mins<br>Unspecified<br>cuff pressure<br>Non-paretic<br>UL        | Sham RIC<br>(unspecified<br>pressure) | mRS day 90                            | Early NIHSS change<br>Infarct volume (DWI MRI)<br>Metabolomic and lipidomic<br>biomarkers              |
| SERIC-AIS<br>(NCT03669653)<br>China<br>2018-22  | Recruiting            | AIS                        | 912 | 4 x 5 mins<br>(200mmHg)<br>UL<br>Twice daily<br>Up to 7 days           | Sham RIC<br>(60mmHg)                  | mRS day 90                            | NIHSS day 7<br>Inflammatory cytokines                                                                  |
| SERICT-AIS<br>(NCT04027621)<br>China<br>2019-20 | Completed             | AIS + tPA                  | 50  | 4 x 5 mins<br>(200mmHg)<br>UL<br>Twice<br>between 6-<br>24hrs post tPA | Sham RIC<br>(60mmHg)                  | Adverse events                        | NIHSS day 7 or discharge<br>mRS day 90                                                                 |
| rTPA-RIC<br>(NCT02886390)<br>China<br>2018-19   | Recruiting            | AIS + tPA                  | 60  | 5 x 5 mins<br>(200mmHg)<br>Bilateral UL                                | tPA alone                             | MRI DWI infarct<br>volume at 72 hours | NIHSS day 5-7<br>mRS day 90<br>Recurrent events day 90<br>MMP-9, IL-6, HS-CRP at<br>baseline and Day 7 |
| rTPA-RIC1<br>(NCT03231384)<br>China<br>2017-18  | Completed             | AIS + tPA                  | 31  | 5 x 5 mins<br>(200mmHg)<br>Bilateral UL                                | tPA alone                             | Feasibility                           | Signs of tissue or<br>neurovascular injury<br>Infarct volume (MRI) day 7<br>NIHSS day 7<br>mRS day 90  |
| RIC-ACS<br>(NCT03868007)                        | Not yet<br>recruiting | Age $\geq$ 60<br>AIS + ACS | 80  | 5 x 5 mins<br>(200mmHg)                                                | Sham RIC<br>(60mmHg)                  | All cause mortality at 3<br>months    | NIHSS day 90<br>GRACE score day 90                                                                     |

|                                                     |                       |                                                 |     |                                                                                       |                                       |                                                                                  |                                                                                                  |
|-----------------------------------------------------|-----------------------|-------------------------------------------------|-----|---------------------------------------------------------------------------------------|---------------------------------------|----------------------------------------------------------------------------------|--------------------------------------------------------------------------------------------------|
| China<br>2019                                       |                       |                                                 |     | Bilateral UL<br>14 days                                                               |                                       |                                                                                  |                                                                                                  |
| RIC-SIID<br>(NCT04069546)<br>China<br>2019-20       | Recruiting            | AIS                                             | 30  | 5 x 5 mins<br>(180mmHg)<br>Unilateral UL                                              | Usual care                            | Flow cytometry<br>(immune profile)                                               | Serum cytokines at baseline,<br>day 2 and day 7 (TLR-2, IL-<br>6)<br>Stroke associated pneumonia |
| TRIPCAIS<br>(NCT03218293)<br>China<br>2017-20       | Recruiting            | AIS + tPA                                       | 120 | 5 x 5 mins<br>(3 min<br>deflations)<br>(Unspecified<br>cuff pressure)<br>Bilateral UL | Usual care                            | VEGF, bFGF up to 12<br>months                                                    | NIHSS day 14<br>ADLs day 90                                                                      |
| ICARUS<br>(NCT03481205)<br>USA<br>2018-21           | Not yet<br>recruiting | AIS &<br>LVO<br>(helicopter<br>transit)         | 10  | 3-5 x 5 mins<br>(200mmHg)<br>Bilateral UL                                             | Usual care                            | Feasibility                                                                      | Adverse events                                                                                   |
| NCT03335111<br>China<br>2016-19                     | Recruiting            | AIS                                             | 100 | 5 x 5 mins<br>(50mmHg ><br>SBP)<br>Bilateral UL<br>for 7 days                         | Sham RIC<br>(60mmHg)                  | Serum cytokines and<br>peripheral immune cells<br>at baseline, day 1 & day<br>7. | NIHSS day 7<br>Recurrent stroke at 12 months                                                     |
| ChiCTR-<br>1800018290<br>China<br>2019-20           | Recruiting            | AIS &<br>SAH &<br>'Brain-<br>Heart<br>Syndrome' | 60  | Not specified                                                                         | Usual care                            | Cardiac function (ECG,<br>Echo, serum markers)                                   | mRS at discharge, 30 days<br>and 6 months                                                        |
| DIPIS (ChiCTR-<br>IOR-17012011)<br>China<br>2017-18 | Completed             | AIS                                             | 44  | Not specified                                                                         | Sham RIC<br>(unspecified<br>pressure) | Stroke progression day<br>90                                                     | mRS, NIHSS, vascular events<br>and mortality day 90                                              |
| ChiCTR-IOR-<br>15006549 <sup>64</sup>               | Recruiting            | AIS                                             | 400 | 4 x 5 mins<br>(200mmHg)                                                               | Sham RIC<br>(30mmHg)                  | Feasibility                                                                      | Infarct volume<br>mRS                                                                            |

|                                              |            |                     |     |                                                                                                    |                                                                                                           |                                                                                |                                                 |
|----------------------------------------------|------------|---------------------|-----|----------------------------------------------------------------------------------------------------|-----------------------------------------------------------------------------------------------------------|--------------------------------------------------------------------------------|-------------------------------------------------|
| China<br>2015-18                             |            |                     |     | Non-paretic<br>UL<br>for 14 days                                                                   |                                                                                                           |                                                                                | NIHSS<br>Mortality                              |
| NCT03968068<br>UK<br>2019-20                 | Recruiting | AIS                 | 48  | 4 x 5 mins<br>(200mmHg)<br>Unilateral UL                                                           | 30 mins AE<br><br>30 mins AE<br>in healthy<br>controls<br><br>RIC 4 x 5<br>mins in<br>healthy<br>controls | Adverse events<br>Discomfort (Likert<br>Scale)<br>% interventions<br>completed | CBFv (TCD)                                      |
| ERVAS <sup>65</sup><br>India<br>2018-present | Recruiting | Aneurysma<br>1 SAH  | 24  | 3 x 5 mins<br>(30mmHg ><br>SBP)<br>UL<br>Every 48<br>hours up to<br>day 7-10                       | Sham RIC<br>(30mmHg)                                                                                      | Vasospasm (TCD,<br>angiography)<br>Serum Biomarkers<br>(S100B, NSE)            | GOSE at 1, 3 and 6 months                       |
| PreLIMBS<br>(NCT02411266)<br>USA<br>2018-22  | Recruiting | Aneurysma<br>1 SAH  | 60  | 3 x 10 mins<br>(5 min<br>deflation)<br>(200mmHg)<br>Unilateral LL<br>every 1-2 days<br>for 14 days | Sham RIC<br>(30mmHg)                                                                                      | Adverse events                                                                 | mRS day 90                                      |
| NEAT2<br>(NCT03561311)<br>China<br>2018-19   | Recruiting | Ruptured<br>CA + ET | 210 | Unspecified<br>cycles<br>(200mmHg)<br>Bilateral UL                                                 | Sham RIC<br>(60mmHg)                                                                                      | Ischaemic lesions (MRI<br>DWI) at 72 hours                                     | NIHSS day 7<br>Cerebrovascular events day<br>30 |

|                                                                  |                              |                                          |     |                                                                                 |                               |                                                                      |                                                                                                            |
|------------------------------------------------------------------|------------------------------|------------------------------------------|-----|---------------------------------------------------------------------------------|-------------------------------|----------------------------------------------------------------------|------------------------------------------------------------------------------------------------------------|
| RIPC-SAH<br>(NCT02381522)<br>USA<br>2015-19                      | Active,<br>not<br>recruiting | Aneurysma<br>l SAH                       | 26  | 4 cycles<br>(unspecified<br>length)<br>(20mmHg ><br>SBP)<br>Unilateral LL       | Sham RIC<br>(20mmHg <<br>SBP) | Vasospasm (TCD)                                                      | mRS<br>Mortality<br>Additional neurological<br>events                                                      |
| RICE-PAC<br>(NCT03152799)<br>UK<br>2017-19                       | Unknown                      | AIS<br>(anterior<br>circulation)<br>+ MT | 60  | Unspecified<br>protocol<br><br>Non-paretic<br>UL                                | Sham RIC                      | Penumbral salvage<br>(MRI) at 3 months                               | Cerebral oedema and infarct<br>size day 7<br>mRS, NIHSS and QoL at 3<br>months                             |
| ChiCTR-INR-<br>17012308<br>China<br>2017-20                      | Not yet<br>recruiting        | AIS                                      | 200 | 3 x 5 mins<br>(20mmHg ><br>SBP)<br>Unilateral UL                                | Sham RIC<br>(0mmHg)           | Coagulant Function<br>(TEG-MA)                                       | mRS at 12 months<br>Recurrent ischaemic stroke                                                             |
| <b>CHRONIC REMOTE ISCHAEMIC POST-CONDITIONING</b>                |                              |                                          |     |                                                                                 |                               |                                                                      |                                                                                                            |
| PICNIC-One<br>(NCT03004820)<br><sup>66</sup><br>China<br>2016-17 | Completed                    | NDS or<br>high-risk<br>TIA               | 167 | 5 x 5 min<br>(200mmHg)<br>Bilateral UL<br>Twice daily<br>90 days                | No<br>comparator              | Recurrent stroke/TIA<br>day 90                                       | Compliance<br>Adverse events<br>Handgrip strength in affected<br>arm at day 90<br>NIHSS, mRS and BI day 90 |
| NCT03635177<br>Denmark<br>2019-21                                | Recruiting                   | Lacunar<br>stroke                        | 20  | Crossover:<br>4 x 5 mins<br>(200mmHg)<br>Unilateral UL<br>Once daily<br>4 weeks | Crossover:<br>Sham RIC        | FMD (brachial artery)                                                | Femoral artery blood flow<br>before and after exercise<br>CBFv during visual task<br>Platelet reactivity   |
| EPIC-sICAS<br>(NCT02323425)<br>China<br>2015-18                  | Unknown                      | sIntraCAS                                | 100 | 5 x 3 mins (5<br>mins<br>deflation)<br>(180mmHg)<br>Bilateral UL                | Usual care                    | Collateral circulation at<br>6 months (MRA, DCE-<br>MRI, TCD, SPECT) | NIHSS at 1 year<br>VEGF and bFGF day 10                                                                    |

|                                               |            |                                                                     |      |                                                                                                                  |                                                                                                                  |                                                           |                                                                                        |
|-----------------------------------------------|------------|---------------------------------------------------------------------|------|------------------------------------------------------------------------------------------------------------------|------------------------------------------------------------------------------------------------------------------|-----------------------------------------------------------|----------------------------------------------------------------------------------------|
|                                               |            |                                                                     |      | Twice daily<br>180 days                                                                                          |                                                                                                                  |                                                           |                                                                                        |
| NCT04039399<br>USA<br>2019-20                 | Recruiting | Chronic unilateral stroke with residual lower limb paresis          | 15   | Crossover:<br>5 x 5 mins<br>(225mmHg)<br>Unilateral LL<br>(Paretic Leg)                                          | Crossover:<br>Sham RIC<br>(10mmHg)                                                                               | Cold Pressor Test and plasma epinephrine & norepinephrine | SBP after RIC and cold pressor test                                                    |
| NCT04038697<br>USA<br>2018-24                 | Recruiting | Chronic unilateral cortical stroke with residual lower limb paresis | 120  | 5 x 5 mins<br>(225mmHg)<br>Unilateral LL<br>(Paretic Leg)<br>12 sessions over 4 weeks<br>+<br>Treadmill Training | Sham RIC<br>(10mmHg)<br>+ Treadmill Training<br><br>RIC alone<br><br>RIC + Treadmill Training (healthy controls) | Self-selected walking speed at 4 weeks (10MWT)            | Knee extensor strength<br>FMD of non-paretic brachial artery<br>Heart rate variability |
| NCT02534545 <sup>29</sup><br>China<br>2015-19 | Recruiting | Ischaemic stroke or high-risk TIA                                   | 3000 | 5 x 5 mins<br>(200mmHg)<br>Bilateral UL<br>Once daily<br>12 months                                               | Sham RIC<br>(60mmHg)                                                                                             | Time to recurrent stroke                                  | All cause mortality<br>NIHSS, mRS and BI at 12 months                                  |
| RICFAST<br>(NCT03794947)<br>UK<br>2019-21     | Recruiting | Stroke at least 6 weeks prior with disabling fatigue                | 34   | 4 x 5 mins<br>(200mmHg)<br>Unilateral UL<br>18 sessions over 6 weeks                                             | Sham RIC<br>(20 mmHg)                                                                                            | Feasibility<br>Adverse events                             | FSS 6 weeks<br><br>Cerebral Perfusion (MRI Perfusion)                                  |
| ChiCTR-                                       | Recruiting | sIntraCAS                                                           | 273  | 5 x 5 min                                                                                                        | 3 x 3 min                                                                                                        | Recurrent stroke/TIA at                                   | NIHSS, mRS and BI at 12                                                                |

|                                                    |            |                                  |     |                                                                                                                                 |                                                                                    |                                             |                                                                                            |
|----------------------------------------------------|------------|----------------------------------|-----|---------------------------------------------------------------------------------------------------------------------------------|------------------------------------------------------------------------------------|---------------------------------------------|--------------------------------------------------------------------------------------------|
| 1800014403<br>China<br>2018-20                     |            |                                  |     | (200mmHg)<br>Bilateral UL<br>Twice daily<br>12 months                                                                           | (200mmHg)<br>Bilateral<br>UL<br>Twice daily<br>12 months<br><br>Usual<br>Treatment | 12 months                                   | months                                                                                     |
| NCT035890<br>China<br>2018-19                      | Recruiting | sIntraCAS                        | 30  | 5 x 5 mins<br>(200mmHg)<br>Bilateral UL<br>Twice daily<br>90 days                                                               | Sham RIC                                                                           | CBF and brain<br>metabolism under stress    | Stroke recurrence                                                                          |
| PICASSO<br>(NCT03208166)<br>USA<br>2017-19         | Completed  | sIntraCAS                        | 2   | 4 x 5 mins<br>(200mmHg)<br>Bilateral UL<br>Daily 30 days                                                                        | Usual care                                                                         | CBF (MRI ASL) day<br>30<br>Feasibility      | Biomarkers at day 30<br>(including Nitrite, IL-10, hs-<br>CRP and MMP-9)                   |
| REM-<br>PROTECT<br>(NCT02169739)<br>USA<br>2015-19 | Recruiting | ≥40 yrs<br><br>Lacunar<br>stroke | 60  | 4 x 5 mins<br>(Unspecified<br>cuff pressure)<br>Once or twice<br>daily<br>One year                                              | Usual care                                                                         | Adherence<br>Patient-reported<br>discomfort |                                                                                            |
| NCT03105141<br>China<br>2017-20                    | Recruiting | sIntraCAS                        | 600 | Bilateral UL.<br>10 treatment<br>groups with<br>varied number<br>of cycles,<br>cycle lengths,<br>frequency and<br>cuff pressure | Several<br>active<br>comparators                                                   | Recurrent stroke at 12<br>months            | Adverse events<br>Cerebral perfusion<br>(multi-modal)<br>Cognition (MMSE, MOCA,<br>TICS-M) |
| ChiCTR190002                                       | Not yet    | sIntraCAS                        | 140 | Not specified                                                                                                                   | Sham RIC                                                                           | NIHSS, mRS & BI day                         | Vascular events day 180                                                                    |



|                                               |                               |                     |     |                                                                                   |                           |                                                                     |                                                                                            |
|-----------------------------------------------|-------------------------------|---------------------|-----|-----------------------------------------------------------------------------------|---------------------------|---------------------------------------------------------------------|--------------------------------------------------------------------------------------------|
| 1006<br>China<br>2019                         | recruiting                    |                     |     |                                                                                   | (unspecified<br>pressure) | 180                                                                 | CBF at day 180                                                                             |
| RIC-CCCA<br>(NCT03721692)<br>China<br>2018-24 | Enrolling<br>by<br>Invitation | sIntraCAS<br>& sCAS | 392 | 5 x 5 mins<br>(Unspecified<br>cuff pressure)<br>UL<br>Once daily<br>3 months      | Usual care                | Combined vascular<br>events at 1 year                               | Time to vascular event<br>All cause mortality at 1 year<br>mRS day 90                      |
| NCT02971462<br>China<br>2016-17               | Unknown                       | sIntraCAS           | 80  | 5 x 5 mins<br>(200mmHg)<br>Bilateral UL<br>Twice daily<br>Unspecified<br>duration | Usual care                | Posterior circulation<br>stroke at 6 months                         | Combined cerebrovascular<br>events at 6 months<br>mRS at 6 months<br>CBF (TCD) at 6 months |
| ChiCTR-OPC-<br>17012871<br>China<br>2016-18   | Unknown                       | Ischaemic<br>stroke | 50  | Daily RIC (not<br>further<br>specified)                                           | None                      | Depression incidence                                                | HDS                                                                                        |
| <b>UNDETERMINED</b>                           |                               |                     |     |                                                                                   |                           |                                                                     |                                                                                            |
| ChiCTR-<br>1900026034<br>China<br>2018-21     | Recruiting                    | AIS                 | 104 | Not specified                                                                     | Usual care                | Neuropsychological<br>evaluation<br>P300 event-related<br>potential | ICAM-1<br>Endothelin-1                                                                     |

**Key:**

10MWT – 10 meter walk test

ACS – Acute Coronary Syndrome

ADL – Activities of daily living

AE – Aerobic exercise

AIS – Acute Ischaemic Stroke

AIS + MT – Acute Ischaemic Stroke plus Mechanical Thrombectomy  
ASL – Arterial spin-labeled  
BDNF – Brain-derived neurotrophic factor  
BI – Barthel index  
bFGF – Basic Fibroblast Growth Factor  
CA – Cerebral aneurysm  
CBF(v) – Cerebral blood flow (velocity)  
DCE-MRI – Dynamic Contrast-Enhanced Magnetic Resonance Imaging  
DWI – Diffusion Weighted Imaging  
ET – Endovascular Therapy  
FMD – Flow Mediated Dilatation  
FSS – Fatigue Severity Score  
GOSE – Extended Glasgow Outcome Scale  
GFAP – Glial Fibrillary Acidic Protein  
HDS – Hamilton Depression Scale  
HIF-1 $\alpha$  – Hypoxia-inducible Factor 1-Alpha  
HSP – Heat shock proteins  
HS-CRP – High Sensitivity C Reactive Protein  
ICAM-1 – Intracellular Adhesion Molecule 1  
ICH – Intracerebral Haemorrhage  
IL-1 $\beta$  – Interleukin 1 Beta  
IL-4 – Interleukin 4  
IL-6 – Interleukin 6  
IL-10 – Interleukin 10  
LL – Lower Limb  
LVO – Large Vessel Occlusion  
MMP-9 – Matrix metalloproteinase-9  
MFI – Multidimensional Fatigue Inventory  
MMSE – Mini-Mental State Examination  
MOCA – Montreal Cognitive Assessment

mRS – Modified Rankin Scale  
NDS – Non-disabling Stroke  
NIHSS – National Institutes of Health Stroke Scale  
NSE – Neuron-Specific Enolase  
QoL – Quality of Life Assessment  
S100B – S100 calcium-binding protein B  
SAH – Subarachnoid Haemorrhage  
SBP – Systolic Blood Pressure  
sIntraCAS – Symptomatic Intracranial Atherosclerosis  
sCAS – Symptomatic Coronary Artery Stenosis  
SPECT – Single Photon Emission Computed Tomography  
TCD – Transcranial Doppler  
TEG-MA – Thromboelastography  
TIA – Transient Ischaemic Attack  
TICS-M – Modified Telephone Interview for Cognitive Status  
  
TLR-2 – Toll-like Receptor 2  
TNF $\alpha$  – Tumour Necrosis Factor Alpha  
tPA – Tissue Plasminogen Activator (Intravenous Thrombolysis)  
UL – Upper Limb  
VEGF – Vascular Endothelial Growth Factor

62. Li X-Q, Tao L, Zhou Z-H et al. Remote ischemic conditioning for acute moderate ischemic stroke (ricamis): Rationale and design. *International Journal of Stroke*.0:1747493019879651
63. Landman T, Schoon Y, Warlé M et al. The effect of repeated remote ischemic postconditioning on infarct size in patients with an ischemic stroke (repost): Study protocol for a randomized clinical trial. *Trials*. 2019;20:167
64. Li Y, Liang K, Zhang L et al. Upper limb ischemic postconditioning as adjunct therapy in acute stroke patients: A randomized pilot. *Journal of Stroke and Cerebrovascular Diseases*. 2018;27:3328-3335
65. Sangeetha RP, Ramesh VJ, Kamath S et al. Effect of remote ischemic preconditioning on cerebral vasospasm and biomarkers of cerebral ischemia in aneurysmal subarachnoid hemorrhage (ervas): A protocol for a randomized, controlled pilot trial. *Brain circulation*. 2019;5:12-18
66. Liu SM, Zhao WL, Song HQ et al. Rationale and study design for a single-arm phase iia study investigating feasibility of preventing ischemic cerebrovascular events in high-risk patients with acute non-disabling ischemic cerebrovascular events using remote ischemic conditioning. *Chinese Med J-Peking*. 2018;131:347-351
