# Supplementary material for: Remote ischaemic conditioning for stroke: unanswered questions and future directions
Source: PubMed Central journal article supplement — Stroke Vasc Neurol. 2021 Apr 26;6(2):298–309. doi: 10.1136/svn-2020-000722 (PMC8258051; doi:10.1136/svn-2020-000722), 2021-04-26
Supplement: svn-2020-000722supp002.pdf [file svn-2020-000722supp002.pdf]

**Supplementary material 2.** Serum biomarkers under investigation as mechanistic markers of the effects of Remote Ischaemic Conditioning in Stroke.

| Serum Biomarker     | Study                                                                                   |
|---------------------|-----------------------------------------------------------------------------------------|
| S100B               | RIPAT (NCT02162654) <sup>26</sup> , ERVAS <sup>58</sup>                                 |
| NSE                 | RIPAT (NCT02162654) <sup>26</sup> , ERVAS <sup>58</sup>                                 |
| GFAP                | RIPAT (NCT02162654) <sup>26</sup>                                                       |
| MMP-9               | RIPAT (NCT02162654) <sup>26</sup> , rTPA-RIC (NCT02886390), PICASSO (NCT03208166)       |
| BDNF                | RICAMIS (NCT03740971) <sup>55</sup>                                                     |
| VEGF                | RICAMIS (NCT03740971) <sup>55</sup> , TRIPCAIS (NCT03218293), EPIC-sICAS (NCT02323425), |
| HIF-1 $\alpha$      | RICAMIS (NCT03740971) <sup>55</sup>                                                     |
| TNF- $\alpha$       | RICAMIS (NCT03740971) <sup>55</sup>                                                     |
| IL-1 $\beta$        | RICAMIS (NCT03740971) <sup>55</sup>                                                     |
| IL-4                |                                                                                         |
| IL-6                | RICAMIS (NCT03740971) <sup>55</sup> , rTPA-RIC (NCT02886390), RIC-SIID (NCT04069546)    |
| IL-10               | PICASSO (NCT03208166)                                                                   |
| TLR-2               | RIC-SIID (NCT04069546)                                                                  |
| MicroRNA            | RESIST (NCT03481777)                                                                    |
| HS-CRP              | rTPA-RIC (NCT02886390), PICASSO (NCT03208166)                                           |
| bFGF                | TRIPCAIS (NCT03218293), EPIC-sICAS (NCT02323425)                                        |
| TEG-MA              | ChiCTR-INR-17012308                                                                     |
| Platelet reactivity | NCT03635177                                                                             |
| Epinephrine         | NCT04039399                                                                             |
| Norepinephrine      | NCT04039399                                                                             |
| Nitrite             | PICASSO (NCT03208166)                                                                   |
| ICAM-1              | ChiCTR-1900026034                                                                       |
| Endothelin-1        | ChiCTR-1900026034                                                                       |

S100B – S100 calcium-binding protein B

NSE – Neuron-Specific Enolase

GFAP – Glial Fibrillary Acidic Protein

MMP-9 – Matrix metalloproteinase-9

BDNF – Brain-derived neurotrophic factor

VEGF – Vascular Endothelial Growth Factor

HIF-1 $\alpha$  – Hypoxia-inducible Factor 1-Alpha

TNF $\alpha$  – Tumour Necrosis Factor Alpha

IL-1 $\beta$  – Interleukin 1 Beta

IL-4 – Interleukin 4

IL-6 – Interleukin 6

IL-10 – Interleukin 10

TLR-2 – Toll-like Receptor 2

HS-CRP – High Sensitivity C Reactive Protein

bFGF – Basic Fibroblast Growth Factor

TEG-MA – Thromboelastography

ICAM-1 – Intracellular Adhesion Molecule 1
